# Supplementary material
Source: HighWire-hosted journal article supplement (https://www.rcpjournals.org/highwire/filestream/12768/field_highwire_adjunct_files/7/S5._Patient-reported_satisfaction_with_quality_of_life_before_and_after_COVID_pneumonia..pdf)
Supplement: S5._Patient-reported_satisfaction_with_quality_of_life_before_and_after_COVID_pneumonia..pdf [file S5._Patient-reported_satisfaction_with_quality_of_life_before_and_after_COVID_pneumonia..pdf]

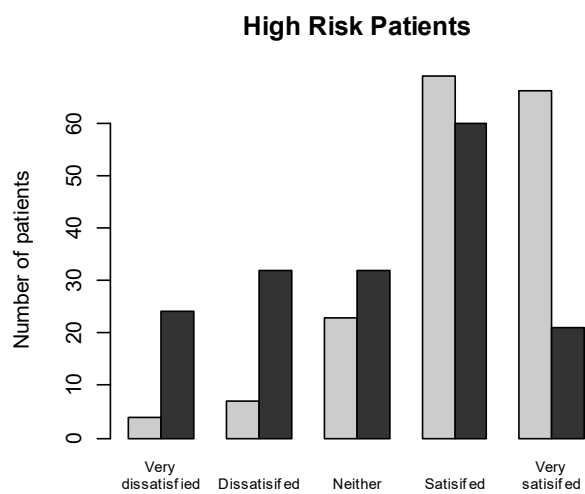

QOL before and after COVID

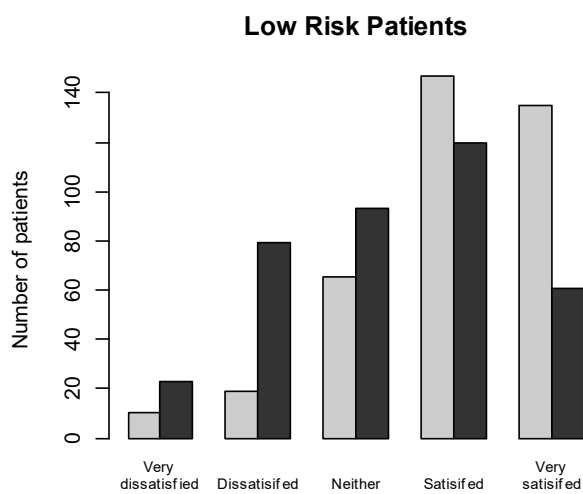

QOL before and after COVID

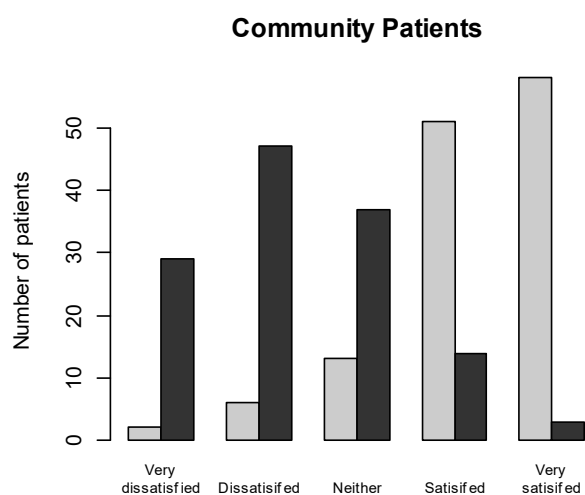

QOL before and after COVID

Before  
 After

**S5. Patient reported satisfaction with quality of life before (grey) and after (black) COVID pneumonia.**
